# Supplementary material
Source: PubMed Central journal article supplement (PMC3865159)
Supplement: NIHMS525976-supplement-1_si_001.pdf [file NIHMS525976-supplement-1_si_001.pdf]

# Supplimentary Information for Study of the $\gamma$ D-Crystallin Protein Using Two-Dimensional Infrared (2DIR) Spectroscopy : Experiment and Simulation

A. R. Lam,<sup>\*,†</sup> S. D. Moran,<sup>‡</sup> N. K. Preketes,<sup>†</sup> T. O. Zhang,<sup>‡</sup> M. T. Zanni,<sup>‡</sup> and  
S. Mukamel<sup>†</sup>

*Department of Chemistry, University of California, Irvine, Irvine, CA 92697-2025 USA, and  
Department of Chemistry, University of Wisconsin, Madison, 1101 University Avenue, Madison,  
WI 53706 USA*

E-mail: alamng@uci.edu

---

\*To whom correspondence should be addressed

<sup>†</sup>University of California, Irvine

<sup>‡</sup>University of Wisconsin, Madison

The full-width at half-maximum (FWHM) node slopes were determined using the protocol in reference 1. First, the frequencies and FWHM of the diagonal peaks were determined. Next, the points of zero intensity between the positive and negative peaks were located across the FWHM of the diagonal peaks. Finally, we fit these points to a straight line, with the slope yielding the FWHM node slope.

**Table S1: Diagonal peak frequencies ( $\omega_{max}$ ) and FWHM node slopes for simulated and experimental xxxx 2DIR spectra.**

|                                          | Simulation |                                    | Experiment <sup>1</sup> |                                    | Assignment |
|------------------------------------------|------------|------------------------------------|-------------------------|------------------------------------|------------|
|                                          | Node Slope | $\omega_{max}$ (cm <sup>-1</sup> ) | Node Slope              | $\omega_{max}$ (cm <sup>-1</sup> ) |            |
| <sup>12</sup> C-Ntd/ <sup>12</sup> C-Ctd | 1.38       | 1633                               | 1.30                    | 1642                               | Ntd+Ctd    |
| <sup>13</sup> C-Ntd/ <sup>13</sup> C-Ctd | 1.45       | 1593                               | 1.25                    | 1598                               | Ntd+Ctd    |
| <sup>12</sup> C-Ntd/ <sup>13</sup> C-Ctd | 1.43       | 1594                               | 1.09                    | 1601                               | Ntd        |
|                                          | 1.33       | 1634                               | 1.32                    | 1640                               | Ctd        |
| <sup>13</sup> C-Ntd/ <sup>12</sup> C-Ctd | 1.28       | 1633                               | 1.26                    | 1638                               | Ctd        |
|                                          | 1.35       | 1595                               | 1.14                    | 1596                               | Ntd        |

## References

- (1) Moran, S., Woys, A., Buchanan, L., Bixby, E., Decatur, S., and Zanni, M. Two-dimensional IR Spectroscopy and Segmental <sup>13</sup>C Labeling Reveals the Domain Structure of human  $\gamma$ D-Crystallin Amyloid Fibrils. *Proc. Natl. Acad. Sci. USA* 2012, *109*(9), 3329–3334
